# Supplementary material
Source: Elsevier journal article supplement (https://www.sciencedirect.com/science/article/pii/S0034935618301427)
Supplement: mmc1 [file S0034935618301427:mmc1.docx]

**ANEXOS**

**Anexo 1. Clasificación de Cormack-Lehane modificada por Cook.**

**
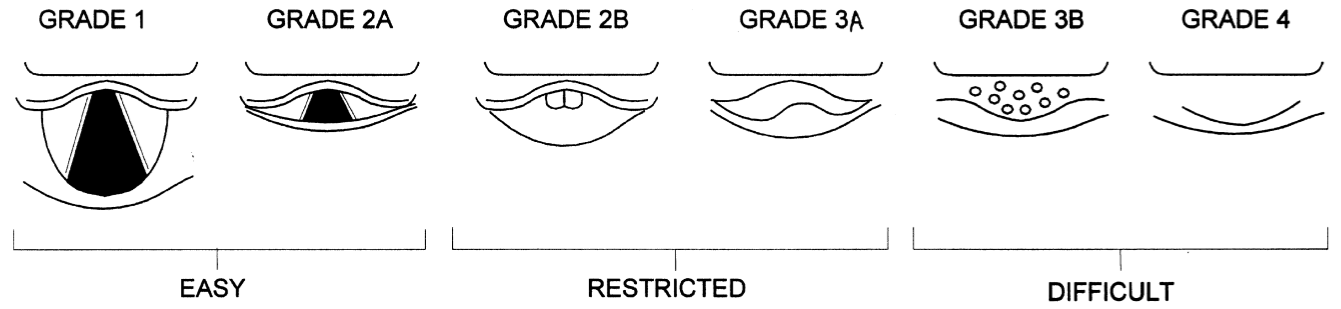
**

| **Grade** | **Grado** |
| --- | --- |
| **Easy** | **Fácil** |
| **Restricted** | **Restringida** |
| **Difficult** | **Difícil** |
